# Supplementary material for: Stratospheric aerosol formed from the boiling sea induced by the 2022 Hunga Ha’apai volcanic eruption
Source: Copernicus journal article supplement (doi:10.5194/egusphere-2025-971), 2025-03-24
Supplement: Supplementary file 1 [file egusphere-2025-971-supplement.pdf]

1 **Supplementary Figures**

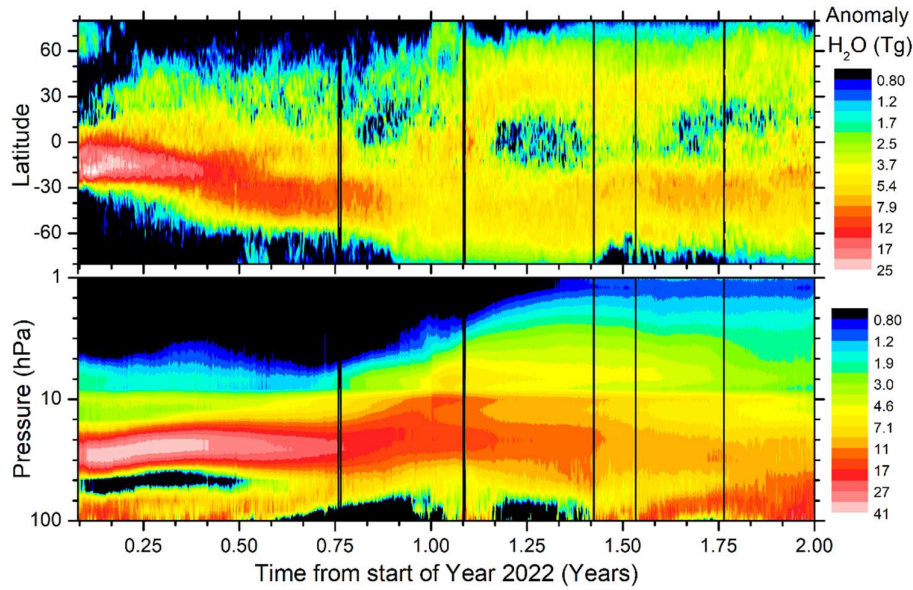

2

3 **Figure S1.** Distributions of water vapor ( $H_2O$ ) in the stratosphere after the 2022 Hunga Tonga volcanic eruption.  
4 a) Latitude and b) altitude distributions of  $H_2O$  anomaly. The integration element sizes in a) span 1 – 100 hPa,  
5  $4^\circ$  in latitude and  $360^\circ$  in longitude, and in b)  $-82$  to  $82^\circ$  in latitude,  $360^\circ$  in longitude and atmospheric pressure  
6 ratio 1.21 ( $\sim 1.32 \pm 0.1$  km). The minor vertical tick marks show five of the eleven measurement levels inside a  
7 decade (1.5, 2.2, 3.2, 4.6 and 6.8 hPa respectively, and 10 times these values in the next decade).

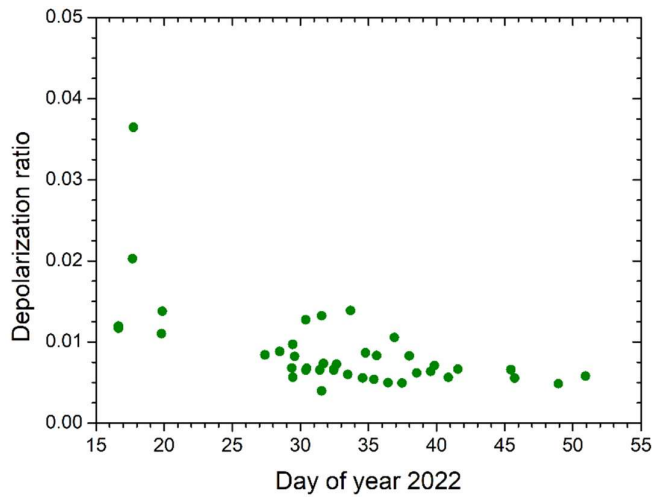

8

9 **Figure S2.** Particle depolarization ratio of dense aerosol layers from CALIOP the first few weeks after the HT-  
10 22 eruption.

11
